# Supplementary material for: Clinical application of the MEK inhibitor trametinib in dogs with oral squamous cell carcinoma
Source: Research Square preprint supplement (doi:10.21203/rs.3.rs-6821917/v1), 2025-06-17
Supplement: Supplementary file 1 [file 2aabd35930b8cf51cba08285.docx]

Patient Name and Case #


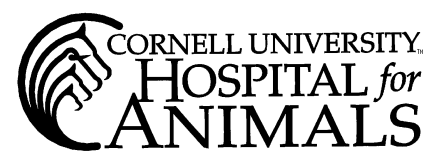


O

NCOLOGY

S

ECTION

Patient

Update

Form

**Date:**

**Phone**

**number**

you

can

be

reached

at:

**Time**

you

will

be

available

at

that

phone

number:

**Discharge**

**hours**

are

assigned according to all patient needs

between 4

-

5

pm

***Please complete the following form as accurately as possible.***

*This information is important in helping us make the best treatment decision for your pet.*

| 1. Have you noted any signs of **tumor growth** since your last | 2. Describe your pet’s **activity level** since your |
| --- | --- |
| appointment? | last appointment: |
|  No | Normal |
|  Yes (Please characterize): | Increased   - Mildly decreased - Moderately decreased |
|  Unsure | Severely decreased |


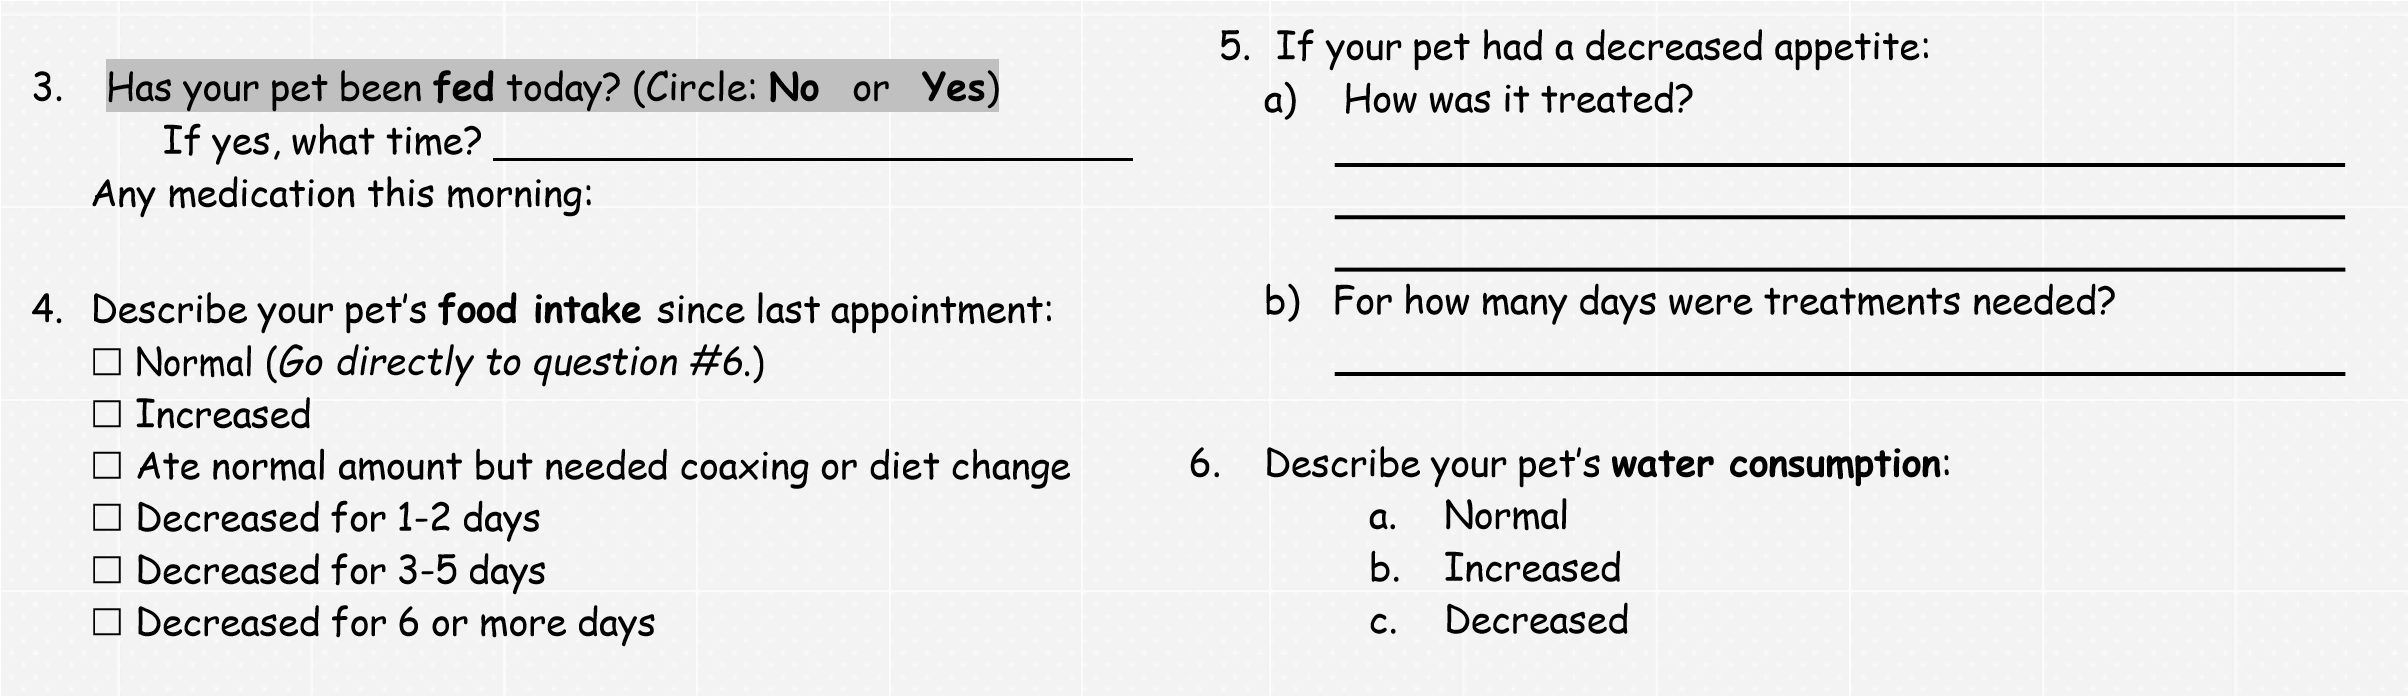


| 7. Did your pet have any **vomiting** since last appointment?   - No *(Go directly to question #13.)* - Yes  Unsure     9. If your pet was vomiting, how many times did s/he vomit?   1-2 times 3-5 times 6+ times      11. If your pet was vomiting, how many days did it last?   - 1 day - 2-4 days - 5 or more days | 8. If your pet was vomiting, how soon after the last appointment did it begin?   Hours 1 day 2-3 days 4+ days    10. If your pet vomited more than 1 time, were the vomit events:   - Less than or equal to 15 minutes apart - More than 15 minutes apart     12. If your pet had any vomiting:   1. How was it treated?      1. For how many days were treatments needed? |
| --- | --- |
| 13. Describe your pet’s **stools** since last appointment:   - Normal/ formed *(Go directly to question #17)* - Soft - Diarrhea | 14. If your pet had any diarrhea, how many times per day did it occur?   Once Twice 3-6 per day 7+ per day |

| 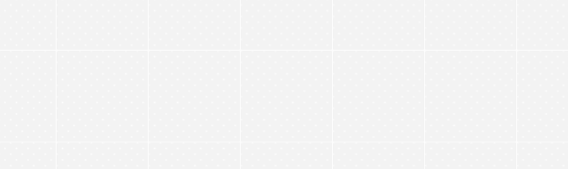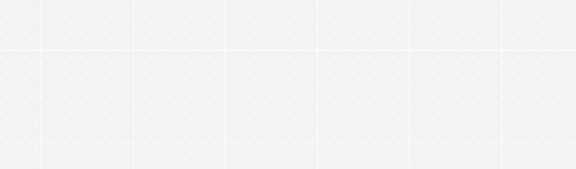 15.    If    your    pet    had    any    diarrhea,    how    soon    after    the    last    16.    If    your    pet    had    any    diarrhea:    appointment    did    it    begin?    a.    How    was    it    treated?        Hours          1    day          2  -  3    days    b.    For    how    many    days  were    treatments    needed?              4    or    more    days |
| --- |
| 17. Describe your pet’s **urination frequency**: 18. Was your pet **straining to urinate**?   - Unchanged (please answer Questions 18-20)  No - Increased up to 2x’s normal  Yes - Increased more than 2x’s normal  Unsure - Hourly   19. Was your pet **leaking urine** since last appointment? 20. Did you notice any **blood in your pet’s urine**?   No Yes Unsure  No Yes Unsure |
| 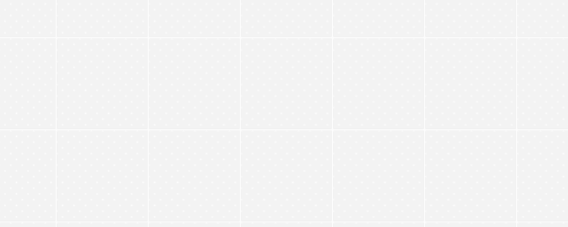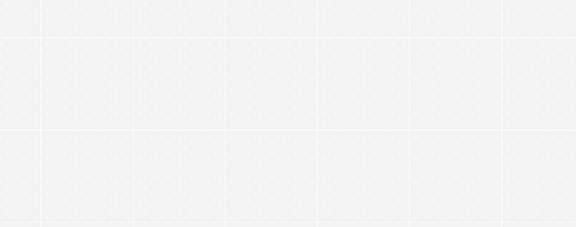 21.    Did    you    observe    any    **coughing**    or    **difficulty**    **breathing**    since    last    appointment?    (  Circle  :    **No**    or    **Yes**  )    If    yes,    please    characterize:    22.    Did    your    pet    show    any    signs  of    being    in    **pain**    since    last    appointment?        No        Mild    pain,    not    interfering    with    daily    activity        Moderate    pain,    interfering    with    daily    activity        Severe    pain,    severely    affecting    daily    activity        Disabling    pain        Unsure |

23. What is your pet’s current diet and how much a day are they eating (ex: can/ cup)? Please include treats and supplements (ex herbs, vitamins). If you have already listed this previously please include just changes that have been made.

_____________________________________________________________________________________________________

24. List medications your pet is receiving. Please be sure to list any preventative medications that your pet receives (ex: heartworm).

| **Medication & Amount (milligrams or number of pills)** | **How Frequently?** | **Refill Needed?** |
| --- | --- | --- |
|  |  |  |
|  |  |  |
|  |  |  |
|  |  |  |
|  |  |  |
|  |  |  |
|  |  |  |
|  |  |  |
|  |  |  |


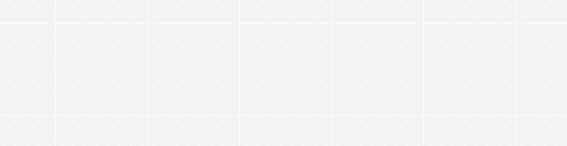

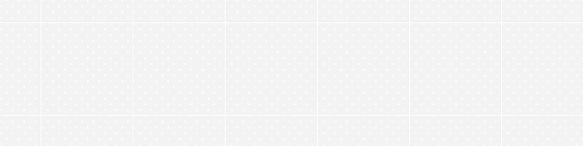


25

a.

Do

you

have

anti

-

nausea

medication

at

home

for

your

pet?

26

a.

Do

you

have

anti

-

diarrheal

medication

at

home

for

your

pet?

b.

Do

you

know

what

and

how

much?

b.

Do

you

know

what

and

how

much?

27

Do

you

give

us

**permission**

**to**

**sedate**

your

pet

today

if

28.

Do

you give

us

**permission**

**to**

**do**

**additional**

**blood**

**work**

if

needed? Circle: **Yes** or **No** indicated? Circle: **Yes** or **No**

***The above information is true and accurate.***

**Signed:____________________________________________ Date:**
