# Supplementary material for: Clinical application of the MEK inhibitor trametinib in dogs with oral squamous cell carcinoma
Source: Research Square preprint supplement (doi:10.21203/rs.3.rs-6821917/v1), 2025-06-17
Supplement: Supplementary file 2 [file d08a3cbcc214d51ac3a6bb94.xlsx]

## Sheet: Sheet1
Dog	Weight (kg)	Original tumor volume (cm3)	Date of Initial Visit	Exit tumor volume (cm3)	Study Exit Date	Dose (mg/kg)
1	18.8	46.6	2023-07-15	145.42	2023-08-18	0.015 > 0.018
2	4.8	12.08	2023-09-15	18.4	2023-10-16	0.015
3	24.5	13.8468	2023-12-19	2.43	2024-02-26	0.02
4	9	41.2959	2024-01-31	42.67	2024-02-27	0.02 > 0.025
5	8	2.72	2024-02-07	5.73	2024-03-06	0.02
6	37.8	9.04	2024-02-22	6.77	2024-04-17	0.025
7	24.6	0.72	2024-02-29	0.75	2024-04-23	0.02
8	32	40.93	2024-03-12	56.8	2024-04-10	0.025
9	37.6	26.51	2024-04-05	10.94	2024-06-06	0.025
10	22.6	50.87	2024-05-10	78.31	2024-06-07	0.03
11	41.6	45.65	2024-06-06	90	2024-06-23	0.03
12	31	71.62	2024-06-20	46.14	2024-08-28	0.03
13	46.2	0.27	2024-07-24	0	2024-09-18	0.03
14	31.2	5.58	2024-08-07	0.02	2024-10-08	0.03
15	12.3	3.85	2024-08-08	11.65	2024-09-11	0.03
16	10.6	0.94	2024-10-18	0.04	2024-12-19	0.03
17	17	51.9	2024-11-10	60.16	2024-12-20	0.035
18	6	23.69	2024-11-23	59.94	2025-01-13	0.035
19	39.4	13.78	2024-12-02	15.51	2025-01-31	0.035
20	11.8	11.01	2025-01-05	64.32	2025-02-07	0.035

## Sheet: Sheet2
346763	Homer	Korabek	0.015 > 0.018	2023-07-15	2023-08-03	2023-08-18	XXX	XXX	2023-08-18
345792	Samosa	Kapur	0.015	2023-09-15	X	2023-10-16	XXX	XXX	2023-10-16
358603	Coco	Thorn	0.02	2023-12-19	X	2024-01-09	X	2024-02-26	2024-02-26
360506	Tico	Lehneis	0.02 > 0.025	2024-01-31	2024-02-12	2024-02-27	XXX	XXX	2024-02-27
360961	ZuZu	Lurie	0.02	2024-02-07	X	2024-03-06	XXX	XXX	2024-03-06
361803	Olivia	Frigon	0.025	2024-02-22	2024-03-04	2024-03-20	2024-04-01	2024-04-17	2024-04-17
362186	TooKy	Baal Teshuvia	0.02	2024-02-29	2024-03-14	2024-03-25	2024-04-09	2024-04-23	2024-04-23
362566	Izzy	Pagnotta	0.025	2024-03-12	2024-04-10	XXX	XXX	XXX	2024-04-10
363178	Leo	Gauthier	0.025	2024-04-05	2024-04-22	2024-05-08	2024-05-23	2024-06-06	2024-06-06
365865	Alice	Wooster	0.03	2024-05-10	2024-05-24	2024-06-07	XXX	XXX	2024-06-07
367105	Jax	Walker	0.03	2024-06-06	2024-06-23	XXX	XXX	XXX	2024-06-23
367506	Maui	Suppon	0.03	2024-06-20	2024-07-17	2024-07-31	2024-08-14	2024-08-28	2024-08-28
370543	Java	White	0.03	2024-07-24	2024-08-07	2024-08-21	2024-09-04	2024-09-18	2024-09-18
370964	Victor	Zimmerman	0.03	2024-08-07	2024-08-22	2024-09-10	2024-09-24	2024-10-08	2024-10-08
371901	Ernie	Miller	0.03	2024-08-08	2024-08-23	2024-09-11	XXX	XXX	2024-09-11
278650	Daisy	Nicolette	0.03	2024-10-18	2024-11-05	2024-11-21	2024-12-03	2024-12-19	2024-12-19
376832	Fall	Harrington	0.035	2024-11-10	2024-12-09	2024-12-20	XXX	XXX	2024-12-20
378024	El Jefe	Grundy	0.035	2024-11-23	X	X	2025-01-13	X	2025-01-13
378180	Harrison	Lenzinger	0.035	2024-12-02	2024-12-20	2025-01-10	X	2025-01-31	2025-01-31
379659	Simone	Parambil	0.035	2025-01-05	rdvm	2025-02-07	XXX	XXX	2025-02-07
